# Supplementary material for: The Major Cellular Sterol Regulatory Pathway Is Required for Andes Virus Infection
Source: PLOS journal article supplement (doi:10.1371/journal.ppat.1003911), 2014-02-06
Supplement: S13 (10.1371/journal.ppat.1003911.s013) [file journal.ppat.1003911.s013]

Table S3: Relative virus inputs for cell lines used

|         | <b>rVSV-ANDV</b> | <b>VSV-(HTNV)</b> | <b>VSV-(G)</b> |
|---------|------------------|-------------------|----------------|
| Vero E6 | 1                | 1                 | 1              |
| A549    | 10               | 5                 | 2              |
| CHO-K1  | 12               | 8                 | 2              |
| 293T    | 1                | 5                 | 1              |
| HAP1    | 1                | 6.5               | 1              |

Values are normalized to virus input required to achieve ~30% infection in Vero E6 cells. Numbers reported are the fold increase in viral input needed to achieve similar infection levels in the indicated cell line.
